# **Metabarcoding of unfractionated water samples relates phyto-, zoo- and bacterioplankton dynamics and reveals a single taxon bacterial bloom**

Christian Wurzbacher<sup>1, 2, 3</sup>, Katrin Attermeyer<sup>2, 4</sup>, Marie Therese Kettner<sup>2</sup>, Clara Flintrop<sup>3, 5</sup>, Norman Warthmann<sup>3, 6, 7</sup>, Sabine Hilt<sup>7</sup>, Hans-Peter Grossart<sup>2, 8</sup>, Michael T. Monaghan<sup>3, 7</sup>

1 University of Gothenburg, Department of Biological and Environmental Sciences, Box 461, 40530 Göteborg, Sweden

2 Leibniz-Institute of Freshwater Ecology and Inland Fisheries, Alte Fischerhütte 2, 16775 Stechlin, Germany

3 Berlin Center for Genomics in Biodiversity Research, Königin-Luise-Str. 6-8, 14195 Berlin, Germany

4 Uppsala University, Department of Ecology and Genetics, Limnology, Norbyvägen 18D, 75236 Uppsala, Sweden

5 Helmholtz Young Investigator Group SEAPUMP, Alfred Wegener Institute for Polar and Marine Research, Am Handelshafen 12, 27570 Bremerhaven, and MARUM, University of Bremen, Leobener Strasse, 28359 Bremen, Germany

6 The Australian National University, Research School of Biology, Linnaeus Way, Canberra, ACT 2601, Australia

7 Leibniz-Institute of Freshwater Ecology and Inland Fisheries, Müggelseedamm 301, 12587 Berlin, Germany

8 Potsdam University, Institute of Biochemistry and Biology, Maulbeerallee 2, 14469 Potsdam, Germany

Corresponding authors: Christian Wurzbacher ([christian@wurzbacher.cc](mailto:christian@wurzbacher.cc)), Katrin Attermeyer ([katrin.attermeyer@ebc.uu.se](mailto:katrin.attermeyer@ebc.uu.se))

The authors declare no conflict of interest

## Summary

Most studies of aquatic plankton focus on either macroscopic or microbial communities, and on either eukaryotes or prokaryotes. This approach overlooks potential interactions among groups. We tested whether universal DNA-metabarcoding of unfractionated water samples could be used to qualitatively and quantitatively study the temporal dynamics of the total plankton community in a shallow temperate lake. We found significant changes in the relative proportions of normalized sequence reads of eukaryotic and prokaryotic plankton communities over a three-month period in spring. Patterns followed the same trend as plankton estimates using traditional microscopic methods. We characterized the bloom of a conditionally rare bacterial taxon belonging to *Arcicella*, which rapidly came to dominate the whole lake ecosystem and would have remained unnoticed without metabarcoding. Our data demonstrate the potential of universal DNA-metabarcoding applied to unfractionated samples for providing a more holistic view of plankton communities.

## Introduction

Microbial communities are an integral component of total biodiversity (Barberán et al. 2014) and play key roles in all ecosystems. An understanding of their composition and dynamics is critical for studying ecosystem functions and services. Plankton communities in freshwater and marine ecosystems are comprised of both microbial and macroscopic organisms from all three domains of life (archaea, prokaryotes, and eukaryotes). Traditionally, plankton is classified into functional groups such as phytoplankton, zooplankton, and bacterioplankton; or into size classes such as picoplankton, nanoplankton, and

microplankton. This classification has resulted in the emergence of independent fields of inquiry for many of the above groups. This is particularly true for the separation of prokaryotic and eukaryotic groups.

A consequence of this separation is that simultaneous studies of all members of the plankton community are rare, being thus far restricted to marine studies in contemporary environmental surveys (Steele *et al.*, 2011, Lima-Mendez *et al.*, 2015). This is despite the tremendous potential of integrated studies for providing an interdisciplinary view of plankton communities (Fuhrman *et al.*, 2015). Most plankton studies employ size pre-selection steps (i.e. size fractionation by selective filtration) and marker genes targeting bacteria, archaea, or eukaryotes. Less than 1% of studies target all three (SI1). This tradition impairs a full integration of microbial communities into ecological concepts.

We used universal, cross-domain (*Bacteria*, *Archaea*, *Eukarya*) DNA-metabarcoding of unfractionated water samples to study the entire plankton community of the eutrophic, shallow, temperate Lake Gollin (*Kleiner Gollinsee*) in northeastern Germany. We extracted total DNA from direct-filtered (0.2  $\mu\text{m}$ ) lake water (0.5 to 1 L), enabling us to screen all organisms from what is traditionally size-classified as pico- to mesoplankton (per definition 0.2  $\mu\text{m}$  - 20 mm). Our aim was to characterize the whole plankton community and its temporal dynamics in relation to algal biomass over a three-month period in spring (April – June) 2010. This is the period with the highest dynamics of plankton in most temperate eutrophic lakes. Our sampling (see SI1 for parameters and experimental procedures) was part of a larger more traditional

whole-lake survey of bacteria, phytoplankton and zooplankton from April 2010 to December 2011 (Brothers *et al.*, 2013) that we used for comparison.

## Results & Discussion

### *Prokaryotic- and eukaryotic population dynamics*

The universal DNA-metabarcoding of unfractionated water samples successfully amplified across all three domains of life, yielding a total of 1307 bacterial, 388 eukaryal and 190 archaeal OTUs in the dataset. We recovered dominant organisms from nano- to mesoplankton size classes (see SI2 for taxa browsing) including typical freshwater bacteria (e.g. *Polynucleobacter*), phytoplankton (e.g. Cryptophyceae), and zooplankton (e.g., Maxillopoda). One field sample contained a small swimming fish larva, which was detected (as 1% of the total community, classified as Teleostei, see SI2) using our approach. Archaeal sequences were not abundant in Lake Gollin during the study period. This was unlikely to be caused by a primer bias, because the primer pairs have been successfully used to detect a dominance of *Archaea* in a meromictic lake (Gies *et al.*, 2014). The sum parameters for the three domains revealed a pronounced shift from a dominance of eukaryotes in April to a dominance of prokaryotes in June for all sampled water compartments (i.e. littoral, pelagic and sediment zones; Fig. 1a). This was accompanied by an increasing ratio of heterotrophs : phototrophs (SI3).

### *Comparison with microscopical observations*

Abundance patterns based on DNA-metabarcoding data followed the trend of the sum parameters of phyto-, zoo- and bacterioplankton obtained from traditional microscopical counting data (SI3). Counting and sequence data were

not taken on the same day and are thus not directly comparable. Nevertheless, our data describe very well the previously reported dynamics of this lake: In the winter prior to our study period the lake underwent a significant fish-kill event caused by a prolonged ice-cover that led to anoxia. Thus, this event had an important impact on the whole lake ecosystem. There was a bloom of herbivorous ciliates in April 2010 (Lischke *et al.*, 2016) that was clearly visible in our data (approx. 30%, Fig. 1d). The ciliates likely exerted a very high grazing pressure upon the small plankton (<5 µm; Lischke *et al.*, 2016), which was mitigated when the ciliate population crashed in May-June (Fig. 1d) and replaced by increasing crustacean abundances (Hilt *et al.*, 2015; in our data especially in the pelagic zone, SI3). The replacement of ciliates by crustaceans may have then opened a niche for the observed bacterial dominance in June, through reduced grazing pressure and increased substrate supply via sloppy feeding of the copepods (Fig. 1).

#### *Bloom-forming OTUs*

Curiously, the bacterial dominance in June was attributed to operational taxonomic units (OTU) classified as the genera *Arcicella* and *Variovorax*. A single *Arcicella* OTU was most abundant in the pelagic, open water and potentially colonized the water from the surface (sampling depth = 1 m), where it reached highest proportions (Fig. 1b). *Variovorax* was more prevalent above the sediment, suggesting colonization from the sediment (Fig. 1c). In contrast to *Variovorax*, which exhibited already stable proportions at the other two sampling dates, *Arcicella* was present at very low abundances in April and May (<0.2%) and can thus be classified as a conditionally rare taxon (Lynch and Neufeld, 2015). There are few reports of blooms of rare bacterial taxa (e.g.,

Gilbert et al., 2012 described a *Vibrio* sp. bloom in the English channel; and Bizic-Ionescu et al. 2014 described the genera *Flavobacterium* and *Undibacterium* associated with a phytoplankton breakdown event in a lake) that were correlated to algae blooms. In order to test whether *Arcicella* was a reoccurring taxon in Lake Gollin or if this was a unique appearance related to the fish-kill disturbance, we screened additional samples (two size-fractions in this case: 0.2-5  $\mu\text{m}$  & > 5  $\mu\text{m}$ ) that were available from Lake Gollin (Brothers et al., 2013). *Arcicella* re-occurred in the following year (Fig. 2) and its appearance appeared negatively related to chlorophyll a concentrations and positively to crustacean biomass (SI1). Thus, this bacterial bloom appears to be rather different than previously described bacterial peak abundances coupled to phytoplankton. The presence of such bloom-forming conditionally rare taxa support the previously described food web dynamics of Lake Gollin (Lischke et al., 2016), and extend it to the microbes. Conditionally rare taxa can have a disproportional significance for the overall community dynamics by shifting the total community structure (Shade et al., 2014), however, knowledge of the ecological and metabolic potential of the rare species is required to draw conclusions about their ecosystem-wide consequences.

### *What is Arcicella?*

Searching through existing freshwater and marine data sets, we found virtually nothing on *Arcicella* with a few exceptions (often in lotic ecosystems). Although not further discussed in their article, *Arcicella* was reported as the second most abundant OTU (6.8%) in all large circumpolar streams (Crump et al., 2009), which instantly raised our attention. In other studies, we had to explicitly ask the authors for *Arcicella*. For example, a single *Arcicella* OTU was among the 10

most dominant OTUs in the large Danube River (however in total it comprised only moderate  $2\% \pm 2\%$ ; Savio pers. comm.; Savio *et al.*, 2015) and again a single *Arcicella* OTU reached  $12 \pm 4\%$  in a small turbid glacial lake (Peter pers. comm.; Peter and Sommaruga, 2016). It seems that this genus has a rather low diversity, but hosts single, occasionally very dominant OTUs. Despite those previous appearances, their autecology has never been investigated.

### *Study limitations*

There was a large standard deviation among our replicates for crustaceans (S3). These organisms belong to the mesoplankton size class (0.2 to 20 mm) and it might be necessary to increase the water volume to better quantify their occurrence in future studies. Sequences belonging to Metazoa could only be classified to order level (e.g. Maxillopoda, Teleostei), because the small ribosomal subunit does not provide sufficient phylogenetically informative characters for many Metazoa groups (Tang et al. 2012). This low taxonomic resolution for certain organismic groups is one of the drawbacks of a universal marker that has to be considered in future studies of these groups. Moreover, DNA based methods are not error free. PCR-based approaches include taxonomic biases introduced by DNA extraction, primer choice, amplification, library preparation and sequencing (Gilbert et al. 2012; Singer et al. 2016). Thus, quantitative estimates can be only seen as semi-quantitative. Universal metabarcoding has the same limitation but at least comes with the advantage, that it provides a balance between all organisms, since most of the DNA template will be derived from the target groups (only excluding virus in this case). To date, it has produced conclusive results for the general trends in plankton communities (our study, see also Gies et al. 2014, Parada et al. 2015,

Needham and Fuhrman 2016).

## Conclusions

Using unfractionated water samples with universal DNA metabarcoding allowed us to document major changes in almost the entire size- and functional spectrum of freshwater plankton with a single water sample analysis. Changes in the relative abundance of OTUs closely matched the seasonal dynamics of phyto-, zoo-, and bacterioplankton reported for this lake based on microscopy, indicating that relative abundance data based on read counts are ecologically meaningful. The discovery of a bloom of a largely overlooked freshwater bacteria genus was remarkable, with potential implications for the whole lake ecosystem. Our results highlight the potential of simultaneously studying both microbial and macrobial communities for an understanding of whole ecosystem changes. Integrative and interdisciplinary analyses may help to answer broad ecological questions in freshwater systems related to the role of keystone species; ecosystem resilience and resistance; and cross-domain interactions of species. Unfractionated sampling coupled to a universal metabarcoding represents a valuable means of studying plankton dynamics in aquatic systems and shows promise for long-term whole community monitoring.

## Acknowledgements

We thank Uta Mallock for chemical analysis, Susan Mbedi for assistance in sequencing and Marie Jeschek for assistance in data processing. This is publication #027 of the Berlin Center for Genomics in Biodiversity Research. Financial support was provided by two projects of the Pact for Research and Innovation of the Leibniz Association “Terralac” and “TEMBI”. R. Tischbier (Stiftung Pro Artenvielfalt) kindly provided us access to the lake.



# References

- Barberán A, Casamayor EO, Fierer N. (2014). The microbial contribution to macroecology. *Front Microbiol* 5: 203.
- Bižić-Ionescu M, Amann R, Grossart, HP. (2014). Massive regime shifts and high activity of heterotrophic bacteria in an ice-covered lake. *PloS one* 9(11): e113611.
- Brothers SM, Hilt S, Attermeyer K, Grossart HP, Kosten S, Lischke B, Mehner T, Meyer N, Scharnweber K, Köhler J. (2013). A regime shift from macrophyte to phytoplankton dominance enhances carbon burial in a shallow, eutrophic lake. *Ecosphere* 4(11): 137. <http://dx.doi.org/10.1890/ES13-00247.1>
- Crump BC, Peterson BJ, Raymond P., Amon RM, Rinehart A, McClelland JW, Holmes RM. (2009). Circumpolar synchrony in big river bacterioplankton. *Proc Natl Acad Sci* 106(50): 21208-21212.
- Engelbrektson A, Kunin V, Wrighton KC, Zvenigorodsky N, Chen F, Ochman H, Hugenholtz P. (2010). Experimental factors affecting PCR-based estimates of microbial species richness and evenness. *ISME J* 4(5): 642-647.
- Fuhrman JA, Cram JA, Needham DM. (2015). Marine microbial community dynamics and their ecological interpretation. *Nat Rev Microbiol* 13(3): 133-146.
- Gies EA, Konwar KM, Beatty JT, Hallam SJ. (2014). Illuminating microbial dark matter in meromictic Sakinaw Lake. *Appl Environ Microbiol* 80(21): 6807-6818.
- Gilbert JA, Steele JA, Caporaso JG, Steinbrück L, Reeder J, Temperton B et al. (2012). Defining seasonal marine microbial community dynamics. *ISME J* 6: 298-308.
- Hilt S, Wanke T, Scharnweber K, Brauns M, Syväranta J, Brothers S et al. (2015). Contrasting response of two shallow eutrophic cold temperate lakes to a partial winterkill of fish. *Hydrobiologia* 749: 31-42.
- Hölker F, Wurzbacher C, Weißenborn C, Monaghan MT, Holzhauer SI, Premke K. (2015). Microbial diversity and community respiration in freshwater sediments influenced by artificial light at night. *Philos T Roy Soc B* 370(1667): 20140130.
- Lima-Mendez G, Faust K, Henry N, Decelle J, Colin S, Carcillo F. et al. (2015). Determinants of community structure in the global plankton interactome. *Science* 348(6237): 1262073.
- Lischke B, Weithoff G, Wickham SA, Attermeyer K, Grossart HP, Scharnweber K et al. (2016). Large biomass of small feeders: ciliates may dominate herbivory in eutrophic lakes. *J Plankton Res* 38(1): 2-15.

Needham DM, Fuhrman JA (2016). Pronounced daily succession of  
phytoplankton, archaea and bacteria following a spring bloom. *Nat Microbiol* 1:  
16005. <http://dx.doi.org/10.1038/nmicrobiol.2016.5>

Parada AE, Needham DM, Fuhrman JA. (2015). Every base matters: assessing  
small subunit rRNA primers for marine microbiomes with mock communities,  
time series and global field samples. *Environ Microbiol* doi: 10.1111/1462-  
2920.13023.

Peter H, Sommaruga R. (2016). Shifts in diversity and function of lake bacterial  
communities upon glacier retreat. *ISME J* doi: 10.1038/ismej.2015.245

Pruesse E, Peplies J, Glöckner FO. (2012). SINA: accurate high-throughput  
multiple sequence alignment of ribosomal RNA genes. *Bioinformatics* 28(14):  
1823-1829.

Savio D, Sinclair L, Ijaz UZ, Parajka J, Reischer GH, Stadler P, et al. (2015).  
Bacterial diversity along a 2600 km river continuum. *Environ Microbiol* 17(12):  
4994-5007.

Schloss PD, Westcott SL, Ryabin T, Hall JR, Hartmann M, Hollister EB, et al.  
(2009). Introducing mothur: open-source, platform-independent, community-  
supported software for describing and comparing microbial communities. *Appl*  
*Environ Microbiol* 75(23): 7537-7541.

Shade A, Caporaso JG, Handelsman J, Knight R, Fierer N. (2013). A meta-  
analysis of changes in bacterial and archaeal communities with time. *ISME J*  
7(8): 1493-1506.

Shade A, Jones SE, Caporaso JG, Handelsman J, Knight R, Fierer N, Gilbert JA.  
(2014). Conditionally rare taxa disproportionately contribute to temporal  
changes in microbial diversity. *MBio* 5(4): e01371-14.

Singer E, Bushnell B, Coleman-Derr D, Bowman B, Bowers RM, Levy A et al.  
(2016). High-resolution phylogenetic microbial community profiling. *ISME J* 10:  
2020-2032.

Steele JA, Countway PD, Xia L, Vigil PD, Beman JM, Kim DY, et al. (2011). Marine  
bacterial, archaeal and protistan association networks reveal ecological  
linkages. *ISME J* 5(9): 1414-1425.

Tang CQ, Leasi F, Obertegger U, Kieneke A, Barraclough TG, Fontaneto D.  
(2012). The widely used small subunit 18S rDNA molecule greatly  
underestimates true diversity in biodiversity surveys of the meiofauna. *PNAS*  
109:16208-16212. 10.1073/pnas.1209160109.

## Figure Legends

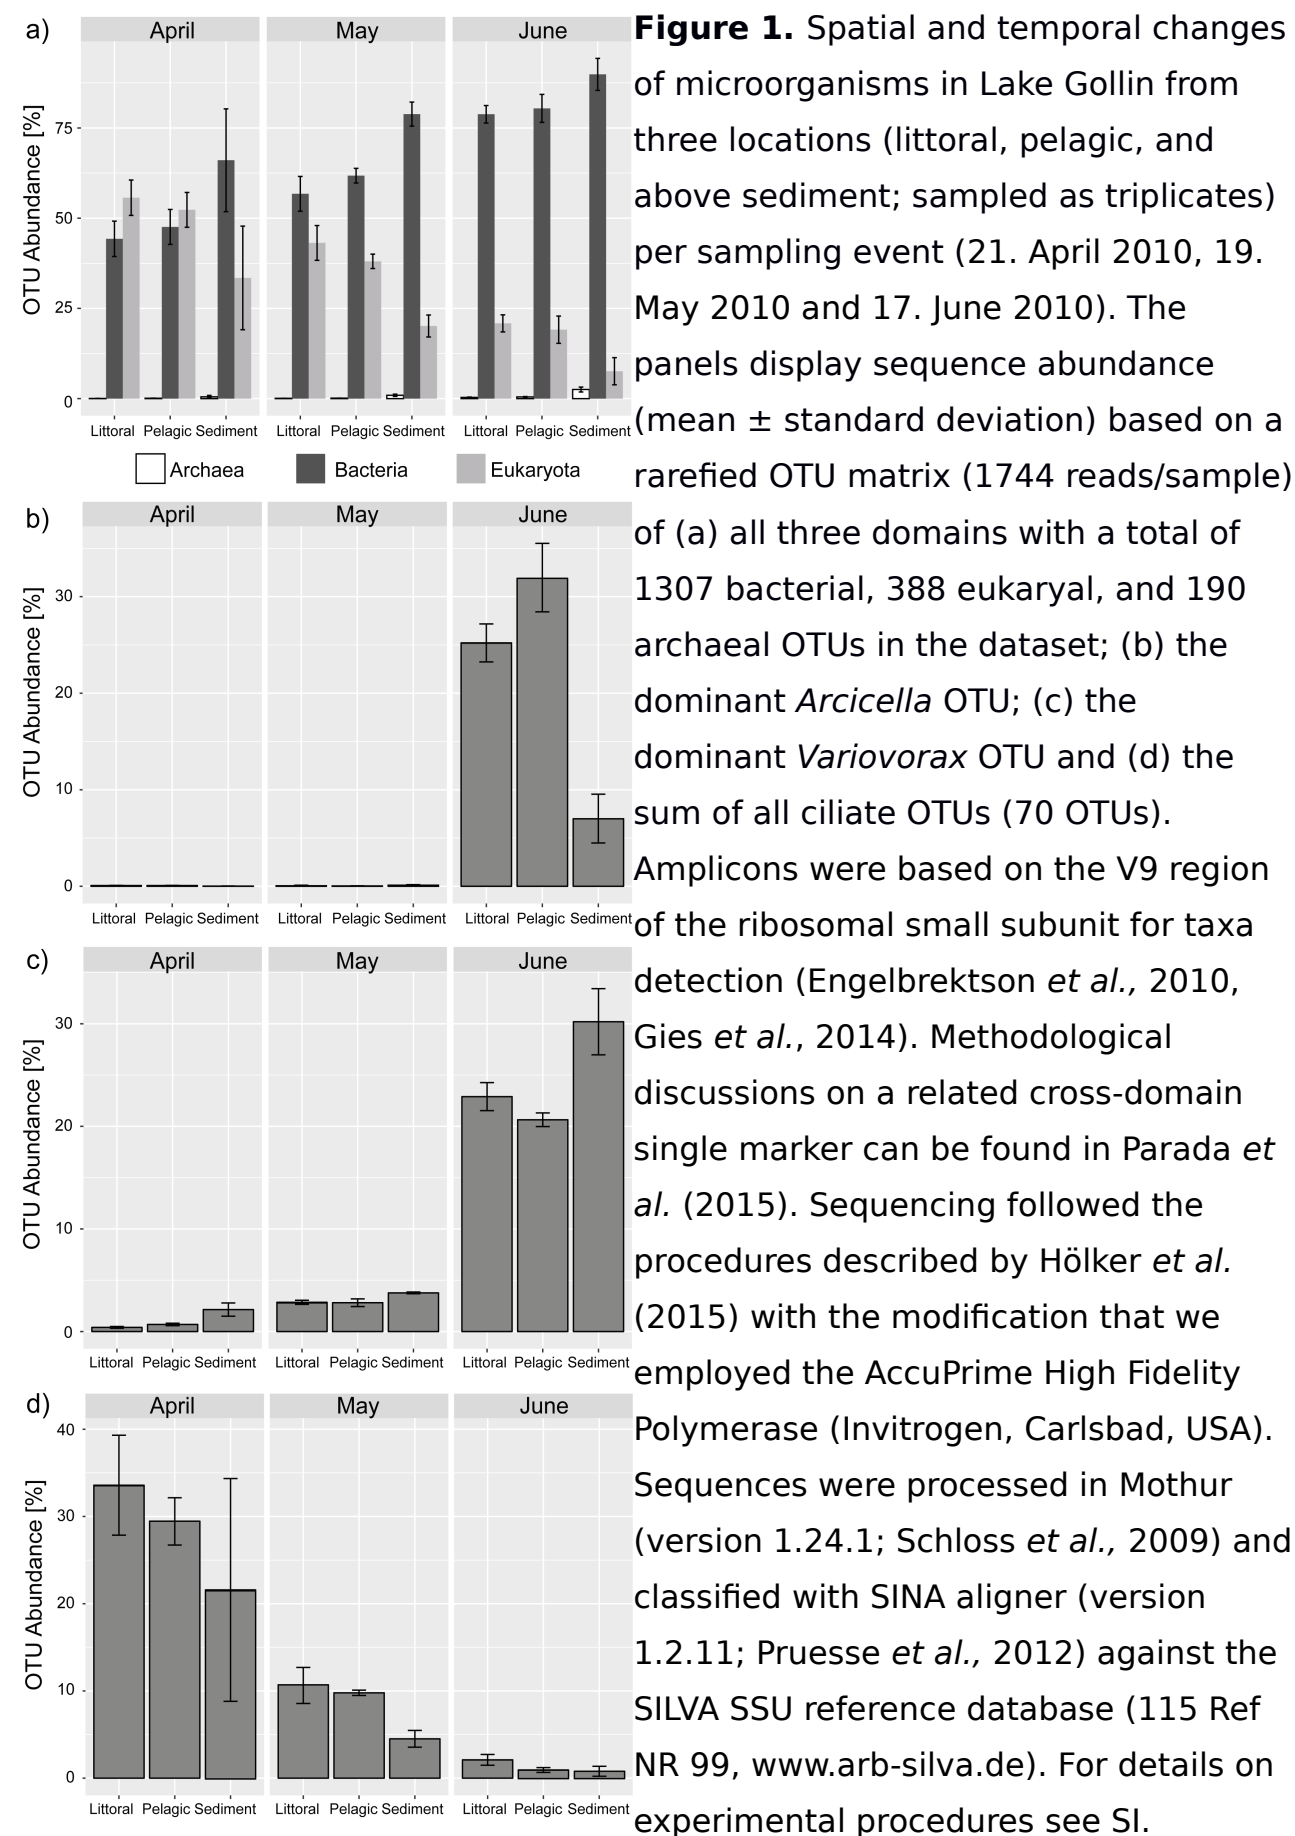

320

321 **Figure 2.** Seasonal appearance of *Arcicella* exhibited pronounced maxima and  
 322 minima over the course of the 2 years and appeared in the particle-attached (>  
 323 5  $\mu$ m) and free-living fraction (0.2 - 5  $\mu$ m). *Arcicella* was detected using a PCR  
 324 assay (see experimental procedures S1) and evaluated based on gel  
 325 electrophoresis band intensity where 0 = no PCR product, 1 = very weak  
 326 product, 2 = weak product, 3 = medium product, 4 = strong product.

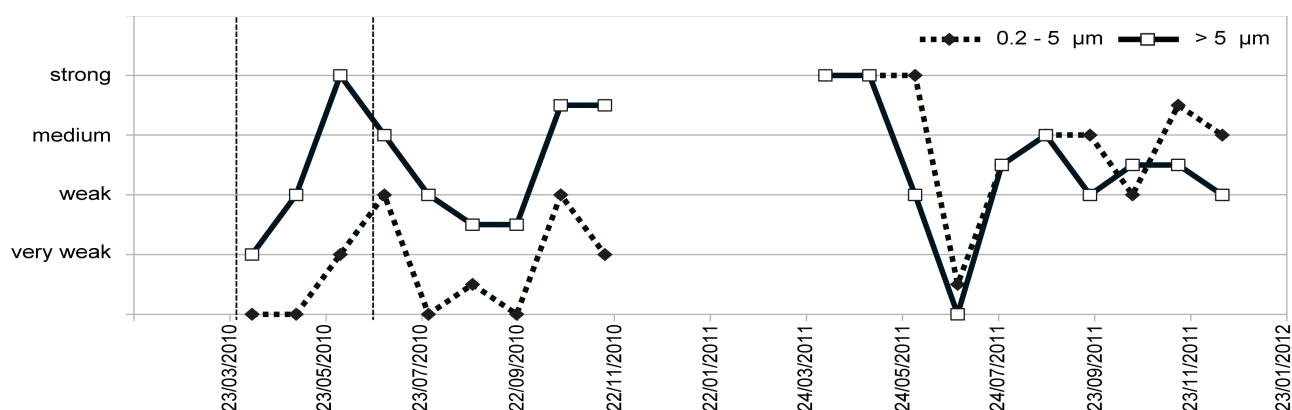

Source: http://biorxiv.org/content/10.1101/058628v2.full.pdf
